# Supplementary material for: Replication-directed sister chromosome alignment in Escherichia coli
Source: PubMed Central journal article supplement (PMC2859247; doi:10.1111/j.1365-2958.2009.06791.x), 2009-07-24
Supplement: mmi0075-1090-SD1.pdf [file mmi0075-1090-SD1.pdf]

## Supplementary material: Liu et al

### Calculation of 8-focus filament proportions (Fig. 2)

The proportions of the 10 type of 8-focus (4 chromosome) cephalixin filaments were calculated based on:

- 1) the lineage relationship that linked F0(mother), F1(daughter), and F2 (grand-daughter) chromosomes in cephalixin filaments according to scenario No.2,
- 2) the proportions of F0 chromosomes that adopted *cis*-<LRLR> ( $p_1$ ), *trans*-<LRLR> ( $p_2$ ), <LRRL> ( $p_3$ ), <RLLR> ( $p_4$ ) during the F0→F1 generation, and
- 3) the proportions of F1 chromosomes that adopted *cis*-<LRLR> ( $p_5$ ), *trans*-<LRLR> ( $p_6$ ), <LRRL> ( $p_7$ ), <RLLR> ( $p_8$ ) during the F1→F2 generation.

If  $p(\langle\text{LRLR}\rangle\langle\text{LRLR}\rangle)$  was the proportion of <LRLR><LRLR> in a population of 8-focus cephalixin filaments, then we should have:

$$p(\langle\text{LRLR}\rangle\langle\text{LRLR}\rangle) = (p_1+p_2)(p_5^2+p_6^2)+(p_3+p_4)p_5p_6$$

Similarly,

$$p(\langle\text{LRLR}\rangle\langle\text{RLRL}\rangle) = (p_1+p_2)p_5p_6+ p_3p_5^2+p_4p_6^2$$

$$p(\langle\text{RLRL}\rangle\langle\text{LRLR}\rangle) = (p_1+p_2)p_5p_6+ p_3p_6^2+ p_4p_5^2$$

$$p(\langle\text{LRLR}\rangle\langle\text{LRRL}\rangle) = (p_1+p_2)(p_5p_7+p_6p_7)+2p_3p_5p_7+ 2p_4p_6p_7$$

$$p(\langle\text{LRLR}\rangle\langle\text{RLLR}\rangle) = (p_1+p_2)(p_5p_8+ p_6p_8)+2p_3p_5p_8+2p_4p_6p_8$$

$$p(\langle\text{LRRL}\rangle\langle\text{LRLR}\rangle) = (p_1+p_2)(p_5p_7+p_6p_7)+ 2p_3p_6p_7+2p_4p_5p_7$$

$$p(\langle\text{RLLR}\rangle\langle\text{LRLR}\rangle) = (p_1+p_2)(p_5p_8+p_6p_8)+2p_3p_6p_8+2p_4p_5p_8$$

$$p(\langle\text{LRRL}\rangle\langle\text{LRRL}\rangle) = (p_1+p_2+p_3+p_4)p_7^2$$

$$p(\langle RLLR \rangle \langle RLLR \rangle) = (p_1 + p_2 + p_3 + p_4)p_8^2$$

$$p(\langle LRRL \rangle \langle RLLR \rangle) = 2(p_1 + p_2 + p_3 + p_4)p_7p_8$$

The values of  $(p_1 + p_2)$ ,  $p_3$ , and  $p_4$ , experimentally determined by examining F0→F1 events in the cell population before cephalixin treatment, were 75.22%, 10.78%, and 14.00%, respectively. The  $p_1/p_2$  ratio was estimated to be 24.79 using time-lapse results shown in Fig 2D. Therefore, we have  $p_1=72.31%$ ,  $p_2=2.92%$ ,  $p_3=10.78%$ ,  $p_4=14.00%$ .

The values of  $(p_5 + p_6)$ ,  $p_7$ , and  $p_8$ , experimentally determined by examining the F1→F2 in 8-focus cephalixin filaments, were 77.87% , 9.51%, and 12.61%, respectively. Similarly, the  $p_5/p_6$  ratio was estimated to be 24.79. Therefore we have  $p_5=74.86%$ ,  $p_6=3.02%$ ,  $p_7=9.51%$ ,  $p_8=12.61%$ .

Using the formulas and the values of  $p_1-p_8$ , the predicted proportions of 10 types of 8-focus cephalixin filaments according to scenario No.2 were calculated and presented in Fig.2.

**Fig S1.** Cell size distributions

**A)** Cell length histograms of L1'-R1' and L2'-R2' cell populations which have been used to generate the data in Fig 1B. In Fig. 1B, only cells with 4 foci were selected for measurement. In Fig S1A, however, all the cells (with 2 or 4 foci) were measured.

**B) and C)** Cell length histograms of the cell populations which have been used to generate the data in Fig. 3 Cells growing at 30°C are shown in Fig S1B and cells growing at 37°C are shown in Fig S1C. In Fig. 3B and 3C, only cells with 4 foci were

selected for analysis. In Fig S1B or Fig S1C, however, all the cells (with 2 or 4 foci) were measured.

**Fig S2.** Cell micrographs

**A)** Two time-lapse series (20 min interval) of F0→F2 cell generations. The R3 foci are shown in red. In the upper panel, The F0→F1 generation is *cis*-<LRLR> and the two F1→F2 generations are *cis*-<LRLR> and <RLLR>. In the lower panel, the F0→F1 generation is <LRRL> and the two F1→F2 generations are *cis*-<LRLR> and *cis*-<LRLR>. **B)** Snapshot images of the 8-focus cephalixin filaments with the L3 foci shown in green and the R3 foci shown in red.

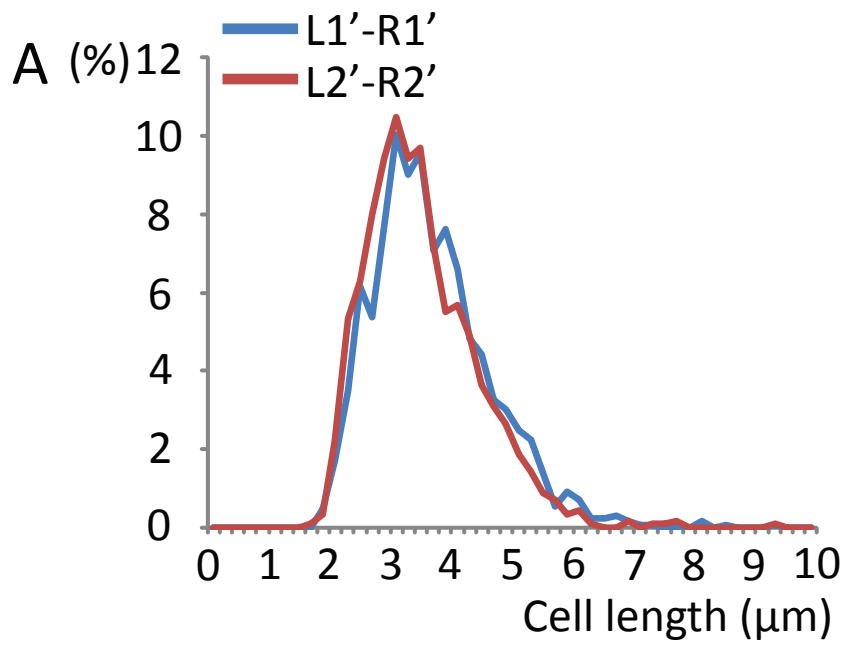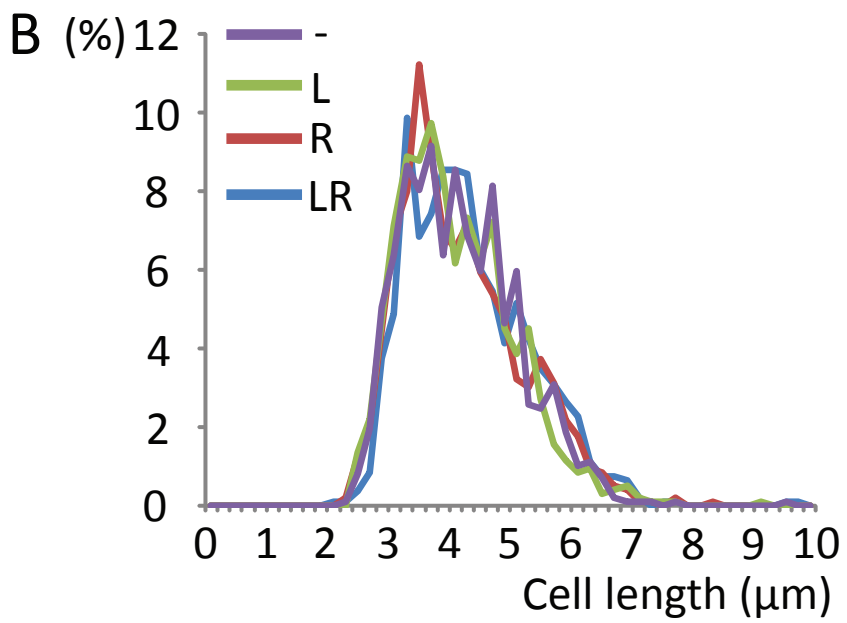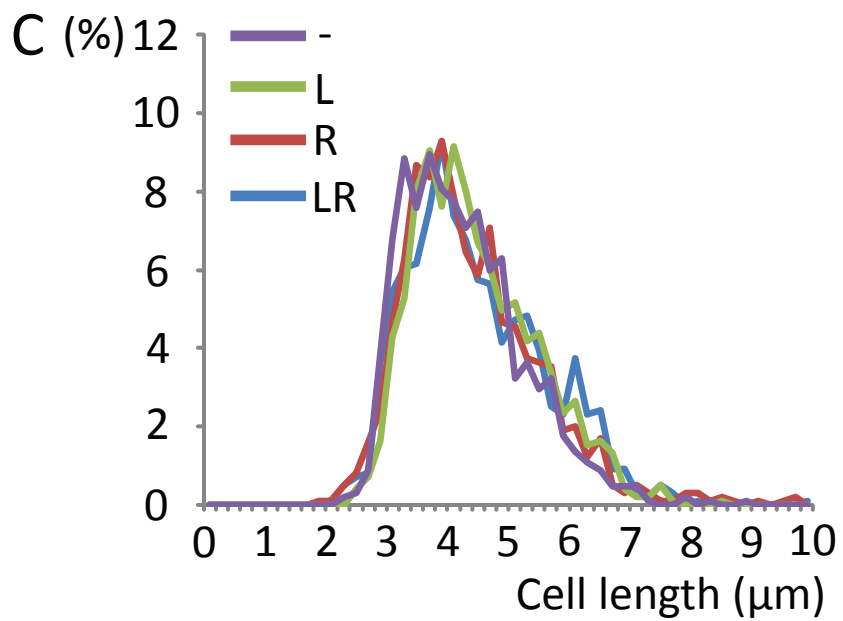

Fig S1\_Liu et al.

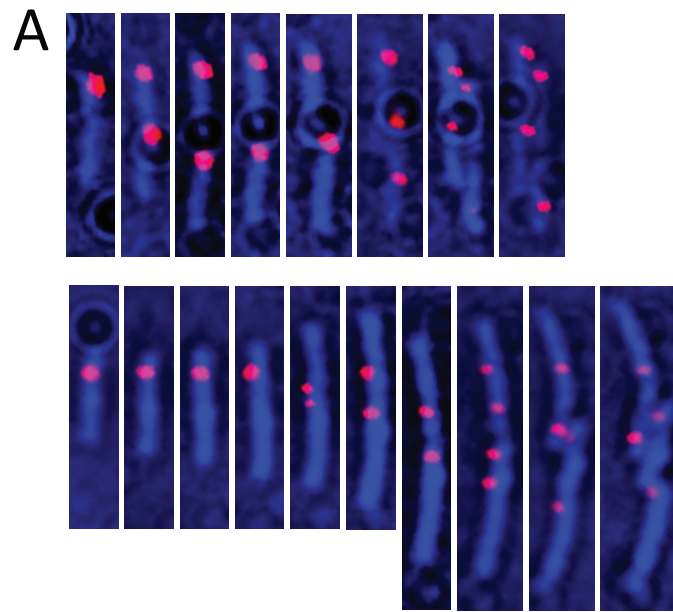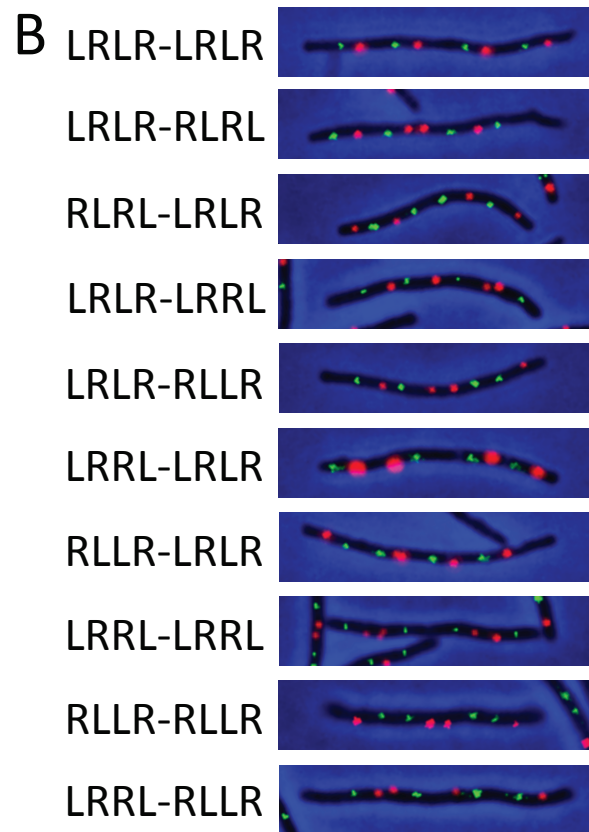

Fig. S2\_Liu et al.
